# Supplementary material for: COVID-19 Vaccination and Neurological Manifestations: A Review of Case Reports and Case Series
Source: Brain Sci. 2022 Mar 18;12(3):407. doi: 10.3390/brainsci12030407 (PMC8946610; doi:10.3390/brainsci12030407)
Supplement: Supplementary file 1 [file brainsci-12-00407-s001.zip › brainsci-1634889-supplementary.pdf]

**Table S1.** Studies with data from case reports and case series on COVID-19 vaccine and CNS associated manifestations.

| Author/<br>country                    | Patient<br>Age/Ge<br>nder | Type<br>of<br>COVI<br>D-19<br>vaccine | Comor-<br>bidities | Time<br>Duration/<br>Doses<br>to<br>neurological<br>symptom<br>onset | Neurological<br>presentations                                                                                                                                                                                                                                  | Diagnostic Modal-<br>ity MRI, CT,<br>MRA/MRV, EEG,<br>CSF analysis                                                                                                                                                                                                           | Diagnosis                      | Manage-<br>ment         | Out-<br>come  |
|---------------------------------------|---------------------------|---------------------------------------|--------------------|----------------------------------------------------------------------|----------------------------------------------------------------------------------------------------------------------------------------------------------------------------------------------------------------------------------------------------------------|------------------------------------------------------------------------------------------------------------------------------------------------------------------------------------------------------------------------------------------------------------------------------|--------------------------------|-------------------------|---------------|
| Malhotra<br>H.S. et.<br>al./ India    | 36 yr/ M                  | Astra-<br>Zeneca                      | None               | 8 days/ first<br>dose                                                | Abnormal sen-<br>sations in both<br>lower limbs.<br>Impaired vi-<br>bration sense<br>till manubrium<br>sterni                                                                                                                                                  | MRI brain: Normal<br>MRI spine: ovoid<br>T2-hyperintense le-<br>sion that showed<br>mild to moderate<br>peripheral enhance-<br>ment on T1-gado-<br>linium contrast ad-<br>ministration                                                                                       | Transverse<br>myelitis         | Methylpre-<br>dnisolone | Im-<br>proved |
| Vegezzi<br>E. et. al./<br>Italy       | 44 yr/ F                  | Astra-<br>Zeneca                      | None               | 4 days/ first<br>dose                                                | Bilateral plan-<br>tar feet ascend-<br>ing paresthesia,<br>reduced sensa-<br>tion in her<br>lower back and<br>during micturi-<br>tion, reduced<br>light touch and<br>pinprick up to<br>ankles and<br>brisk deep ten-<br>don reflexes in<br>the lower limbs     | MRI Brain: Normal<br>MRI spine with<br>contrast: two sin-<br>gle-metamer le-<br>sions, in the poste-<br>rior paramedian<br>cord at D7-D8 level<br>and in the left lat-<br>eral cord at D10-<br>D11 level, the first<br>one with mild and<br>patchy contrast en-<br>hancement | Transverse<br>myelitis         | Methylpre-<br>dnisolone | Im-<br>proved |
| Hsiao<br>Y.T. et.<br>al./ Tai-<br>wan | 41 yr/ M                  | Astra-<br>Zeneca                      | Type 2<br>DM       | 14 days/ first<br>dose                                               | Tingling sensa-<br>tion over T4<br>dermatome<br>was experi-<br>enced, fol-<br>lowed by pro-<br>gressive pares-<br>thesia below<br>T4, along with<br>lower-limb<br>weakness and<br>clumsiness. De-<br>creased lower-<br>limb muscle<br>power, which<br>was more | MRI Brain: Normal<br>MRI Spine: in-<br>tramedullary-en-<br>hancing lesion over<br>the spinal cord at<br>the T1 to T6 verte-<br>bral levels                                                                                                                                   | Transverse<br>myelitis<br>(TM) | Methylpre-<br>dnisolone | Im-<br>proved |

|                           |          |             |                                                                |                     |                                                                                                                                              |                                                                                                                                                                                                                                               |                                                     |                          |          |
|---------------------------|----------|-------------|----------------------------------------------------------------|---------------------|----------------------------------------------------------------------------------------------------------------------------------------------|-----------------------------------------------------------------------------------------------------------------------------------------------------------------------------------------------------------------------------------------------|-----------------------------------------------------|--------------------------|----------|
| severe over the left side |          |             |                                                                |                     |                                                                                                                                              |                                                                                                                                                                                                                                               |                                                     |                          |          |
| Khan E. et. al./ India    | 67 yr/F  | Moderate    | CAD, CKD, neuropathy and previous colon rupture with colostomy | 1 day/ first dose   | Bilateral upper and lower extremity weakness (right more than left), paresthesia                                                             | CT Head: Normal<br>MRI Brain: Scattered patchy foci nonspecific signal changes; MRI cervical spine: Hyperintense lesions in the upper cervical spine and cord edema extending from C1-C3 with patchy post-contrast enhancement                | Transverse myelitis (TM)                            | Methylprednisolone, PLEX | Improved |
| Fujikawa P. et. al./ USA  | 46 yr/ F | Moderate    | Vitamin B12 deficiency                                         | 2 days/ first dose  | Paresthesia distal to the T10 dermatome and bilateral upper- and lower-extremity weakness, partial urinary retention                         | MRI Brain: Normal<br>MRI Spine: T2-weighted MRI of the cervical spine revealed increased, nonexpansile intramedullary signal involving the central gray matter at C6-T2 without enhancement                                                   | Neuromyelitis optica Spectrum Disorder (NMOSD)      | Methylprednisolone       | Improved |
| Chen S. et. al./ China    | NA/ F    | Sinovac     | NA                                                             | 3 days/ first dose  | Dizziness, unsteady walking, nausea, vomiting, weakened pharyngeal reflex, limb muscle strength                                              | MRI Brain: Area postrema and bilateral hypothalamus lesions without gadolinium enhancement                                                                                                                                                    | Neuromyelitis optica Spectrum Disorder (NMOSD)      | Methylprednisolone       | Improved |
| Notghi A.A. et. al./ UK   | 58 yr/ M | AstraZeneca | Type 2 DM, Pulmonary sarcoidosis                               | 10 days/ first dose | Progressive numbness in his lower limbs over 3 days, allodynia up to chest level, genital dysesthesia and an episode of urinary incontinence | MRI Brain: Normal<br>MRI Spine: Myelopathic features at cervical level, showed abnormal cord signal from T2 to T10. With gadolinium contrast revealed two separate foci of enhancing myelitis, at the T3/4-disc level at the T9/10-disc level | Longitudinally Extensive Transverse Myelitis (LETM) | Methylprednisolone, PLEX | Improved |

|                                  |          |             |                                   |                     |                                                                                                                                |                                                                                                                                                                                                                                                   |                                                |                                                       |          |
|----------------------------------|----------|-------------|-----------------------------------|---------------------|--------------------------------------------------------------------------------------------------------------------------------|---------------------------------------------------------------------------------------------------------------------------------------------------------------------------------------------------------------------------------------------------|------------------------------------------------|-------------------------------------------------------|----------|
| Vogrig A.<br>et. al./ Italy      | 56 yr/ F | Pfizer      | Post-infectious rhombencephalitis | 14 days/ first dose | Unsteadiness of gait, predominantly on the left side, followed by clumsiness of the left arm. Mild weakness on left upper limb | MRI Brain: area of hyperintensity involving the left cerebellar peduncle, with modest mass effect on the fourth ventricle, no contrast enhancement                                                                                                | Acute Disseminated Encephalomyelitis (ADEM)    | Prednisone                                            | Improved |
| Etemadifar M. et. al./ Iran      | 34 yr/ F | Sputnik     | MS                                | 3 days/ first dose  | Right hemiplegia, ataxia. She had severe imbalance and an ataxic gait                                                          | MRI Brain: Several new periventricular, juxtacortical, and brainstem, without gadolinium enhancement on T1-weighted sequences.                                                                                                                    | Relapsing Remitting Multiple Sclerosis (RRMS)  | Methylprednisolone                                    | Improved |
| Syed K. et. al./ USA             | 45 yr/ M | Moderna     | Type 2 DM                         | 8 days/ second dose | Headache with a tonic-clonic seizure                                                                                           | CT head: left frontal lobe intracerebral hemorrhage (ICH) along with subarachnoid hemorrhage (SAH).<br>CT angiography: absence of opacification in the anterior 1/2 of the superior sagittal sinus, consistent with acute venous sinus thrombosis | Cerebral Venous Sinus Thrombosis with ICH, SAH | Esmolol, Nimodipine, Levetiracetam, Heparin, Coumadin | Improved |
| Wolf M.E. et. al./ Germany Pt. 1 | 22 yr/ F | AstraZeneca | BMI=26                            | 4 days/ first dose  | Frontally accentuated headaches and generalized epileptic seizures.                                                            | MRI Brain: Blood in the subarachnoid space adjacent to the falx cerebri on both sides. The superior sagittal sinus, the left-hand transverse sinus, and the sigmoid sinus were thrombosed                                                         | Cerebral venous sinus thrombosis               | Levetiracetam, Enoxaparin, Dabigatran                 | Improved |
| Wolf M.E. et. al./ Germany Pt. 2 | 46 yr/ F | AstraZeneca | None                              | 13 days/ first dose | Mild aphasia and hemianopia to the right                                                                                       | MRI Brain: Thrombotic occlusion of the superior sagittal sinus and the left-hand transverse sinus and sigmoid sinus. An acute                                                                                                                     | Cerebral Venous Sinus Thrombosis with ICH      | Danaparoid, Dabigatran                                | Improved |

|                                                  |          |                  |                                 |                        |                                                                            |  |                                                                                                                                                                                                                                  |                                                                                |                                                                                                                |                             |
|--------------------------------------------------|----------|------------------|---------------------------------|------------------------|----------------------------------------------------------------------------|--|----------------------------------------------------------------------------------------------------------------------------------------------------------------------------------------------------------------------------------|--------------------------------------------------------------------------------|----------------------------------------------------------------------------------------------------------------|-----------------------------|
|                                                  |          |                  |                                 |                        |                                                                            |  | intracerebral hema-<br>toma in the left oc-<br>cipital lobe                                                                                                                                                                      |                                                                                |                                                                                                                |                             |
| Wolf<br>M.E. et.<br>al./ Ger-<br>many<br>Pt. 3   | 36 yr/ F | Astra-<br>Zeneca | None                            | 17 days/ first<br>dose | Severe head-<br>ache, acute<br>somnolence<br>and right-hand<br>hemiparesis |  | MRI Brain: Throm-<br>botic occlusion of<br>the straight sinus<br>and a non-occlusive<br>thrombus in the su-<br>perior sagittal si-<br>nus. Congestive<br>edema of both thal-<br>ami was more pro-<br>nounced on the left<br>side | Cerebral ve-<br>nous sinus<br>thrombosis                                       | Danaparoi-<br>d, Enoxap-<br>arin,<br>Dabigatra-<br>n                                                           | Im-<br>proved               |
| Schultz<br>N.H. et.<br>al./ Nor-<br>way<br>Pt. 1 | 37 yr/ F | Astra-<br>Zeneca | Pollen al-<br>lergy,<br>OCP use | 8 days/ NA             | Headaches,<br>visual disturb-<br>ances, fever                              |  | CT head: throm-<br>bosis in the left<br>transverse and sig-<br>moid sinuses. Mas-<br>sive cerebellar hem-<br>orrhage and edema<br>in the posterior<br>fossa                                                                      | Cerebral<br>Venous Si-<br>nus Throm-<br>bosis with<br>Cerebellar<br>hemorrhage | Dalte-<br>parin,<br>Platelet<br>transfu-<br>sion, de-<br>compres-<br>sive crani-<br>ectomy                     | Not im-<br>proved,<br>fatal |
| Schultz<br>N.H. et.<br>al./ Nor-<br>way<br>Pt. 2 | 42 yr/ F | Astra-<br>Zeneca | Pollen al-<br>lergy             | 10 days/ NA            | Headaches,<br>drowsiness                                                   |  | CT venography:<br>Venous thrombosis<br>with occlusion of<br>the transverse and<br>sigmoid sinuses<br>and hemorrhagic<br>infarction in the left<br>hemisphere                                                                     | Cerebral ve-<br>nous sinus<br>thrombosis                                       | Dalte-<br>parin,<br>Methylpre-<br>dnisolone,<br>IVIG,<br>hemicrani-<br>ectomy,<br>platelet<br>transfu-<br>sion | Not im-<br>proved,<br>fatal |
| Schultz<br>N.H. et.<br>al./ Nor-<br>way<br>Pt. 3 | 39 yr/ F | Astra-<br>Zeneca | None                            | 10 days/ NA            | Headache, ab-<br>dominal pain                                              |  | CT head with ve-<br>nography: massive<br>thrombosis in the<br>deep and superfi-<br>cial cerebral veins<br>and right cerebellar<br>hemorrhagic infarc-<br>tion                                                                    | Cerebral ve-<br>nous sinus<br>thrombosis                                       | Dalte-<br>parin,<br>Predniso-<br>lone, IVIG                                                                    | Im-<br>proved               |
| Schultz<br>N.H. et.<br>al./ Nor-<br>way<br>Pt. 4 | 54 yr/ F | Astra-<br>Zeneca | HTN,<br>HRT use                 | 7 days/ NA             | Headache,<br>hemiparesis<br>left side                                      |  | CT head: Right<br>frontal hemorrhage<br>CT venography:<br>massive cerebral<br>vein thrombosis<br>with global edema<br>and growth of he-<br>matoma                                                                                | ICH, cere-<br>bral venous<br>sinus<br>thrombosis                               | Methylpre-<br>dnisolone,<br>IVIG,<br>throm-<br>bectomy,<br>hemicrani-<br>ectomy                                | Not im-<br>proved,<br>fatal |

| Case Report                  |          |     |              |                                                  |                     |                                                                                                                                                                                                                                  |                                                                                                                                                                                                                                                             |                                                                                                                             |                             |
|------------------------------|----------|-----|--------------|--------------------------------------------------|---------------------|----------------------------------------------------------------------------------------------------------------------------------------------------------------------------------------------------------------------------------|-------------------------------------------------------------------------------------------------------------------------------------------------------------------------------------------------------------------------------------------------------------|-----------------------------------------------------------------------------------------------------------------------------|-----------------------------|
| Author(s)                    | Age      | Sex | Medication   | History                                          | Duration            | Onset                                                                                                                                                                                                                            | Signs and Symptoms                                                                                                                                                                                                                                          | Investigations                                                                                                              | Outcome                     |
| Mehta P.R. et. al./ UK Pt. 1 | 32 yr/ M |     | Astra-Zeneca | None, ex-smoker                                  | 9 days/ first dose  | Thunderclap headache and subsequent left-sided incoordination and hemiparesis                                                                                                                                                    | CT head with venography: Superior sagittal sinus and cortical vein thrombosis and significant cortical oedema with small areas of parenchymal and subarachnoid hemorrhage                                                                                   | Cerebral Venous Sinus Thrombosis with SAH                                                                                   | None<br>Not improved, fatal |
| Mehta P.R. et. al./ UK Pt. 2 | 25 yr/ M |     | Astra-Zeneca | Primary sclerosing cholangitis, migraine, smoker | 6 days/ first dose  | Headache with photophobia, neck stiffness, and visual disturbances, associated with a non-blanching petechial rash over his lower limbs and bleeding of his gum, left hemiparesis and hemisensory loss, and focal motor seizures | CT head with venography: superior sagittal sinus thrombosis with extension into the cortical veins, and hemorrhage in lobar and subarachnoid locations                                                                                                      | Cerebral Venous Sinus Thrombosis with SAH<br>Unfractionated Heparin, Dexamethasone, IVIG, Levamisole, platelet transfusions | Not improved, fatal         |
| Castelli G.P. et. al./ Italy | 50 yr/ M |     | Astra-Zeneca | None                                             | 11 days/ first dose | Severe headache, slight deviation of the right buccal rim, loss of strength in the right lower limb, unstable walking and slight visual impairment                                                                               | CT head: intraparenchymal hemorrhage in the left hemisphere<br>CT angiography: multiple bleeding spots within the parenchymal hemorrhage and lack of opacification of the left transverse and sigmoid sinuses, suggesting thrombosis of the venous sinuses. | Cerebral Venous Sinus Thrombosis with ICH<br>Platelet transfusion, bilateral decompressive craniectomy                      | Not improved, fatal         |
| Choi J.K. et. al./ Korea     | 33 yr/ M |     | Astra-Zeneca | None                                             | 9 days/ first dose  | Headache, vomiting, tingling sensation in right arm, dysarthria, right hemiparesis.                                                                                                                                              | CT head: subcortical hematoma in the left parietal lobe and an adjacent subarachnoid hemorrhage                                                                                                                                                             | Cerebral venous sinus thrombosis With ICH<br>Methylprednisolone, IVIG                                                       | Not improved, fatal         |

|                                                  |          |                  |                                 |                        |                                                                                                              |                                                                                                                                                                                                                                                                                                                      |                                                                                                                                                               |                                                                                                 |                             |  |
|--------------------------------------------------|----------|------------------|---------------------------------|------------------------|--------------------------------------------------------------------------------------------------------------|----------------------------------------------------------------------------------------------------------------------------------------------------------------------------------------------------------------------------------------------------------------------------------------------------------------------|---------------------------------------------------------------------------------------------------------------------------------------------------------------|-------------------------------------------------------------------------------------------------|-----------------------------|--|
|                                                  |          |                  |                                 |                        |                                                                                                              |                                                                                                                                                                                                                                                                                                                      | MRI venogram: left sigmoid sinus and internal jugular vein were visualized, and the remaining dural venous sinus was not visualized, suggesting extensive CVT |                                                                                                 |                             |  |
| D'Ago-<br>stino V.<br>et. al./ It-<br>aly        | 54 yr/ F | Astra-<br>Zeneca | NA                              | 12 days/NA             | Cerebrovascu-<br>lar accident-<br>unspecified<br>(DIC, MI,<br>multi-district<br>thromboses)                  | CT head: multiple<br>intra-axial hemor-<br>rhages, with ipsilat-<br>eral hemorrhagic<br>subarachnoid suf-<br>fusion, raising the<br>suspicion of<br>Labbè/superior lon-<br>gitudinal sinus<br>thrombosis<br>MRI Brain: acute<br>basilar thrombosis<br>associated with the<br>superior sagittal si-<br>nus thrombosis | Cerebral ve-<br>nous sinus<br>thrombosis                                                                                                                      | None                                                                                            | Not im-<br>proved,<br>fatal |  |
| Jamme<br>M. et. al./<br>France                   | 69 yr/ F | Astra-<br>Zeneca | HTN                             | 11 days/ first<br>dose | Headache with<br>behavioral<br>symptoms                                                                      | CT head with MRI:<br>severe bilateral<br>frontal hemorrhage<br>with brain herni-<br>ation complicating<br>a cerebral venous<br>thrombosis of the<br>left internal jugular<br>vein, sigmoid sinus<br>and superior sagit-<br>tal sinus.                                                                                | Cerebral ve-<br>nous sinus<br>thrombosis                                                                                                                      | None                                                                                            | Not im-<br>proved,<br>fatal |  |
| Al-<br>Mashdali<br>A.F. et.<br>al./ Qatar        | 32 yr/ M | Moder-<br>na     | None                            | 1 day/ first<br>dose   | Confusion, agi-<br>tation, disori-<br>entation to<br>time, place,<br>person, and<br>memory dis-<br>turbances | MRI Brain: Normal<br>EEG showed find-<br>ings suggestive of<br>acute encephalopa-<br>thy (slowed back-<br>ground activity).                                                                                                                                                                                          | Autoim-<br>mune en-<br>cephalitis                                                                                                                             | Ceftriax-<br>one and<br>Acyclovir<br>(failed),<br>succeeded<br>by IV<br>Methylpre-<br>dnisolone | Im-<br>proved               |  |
| Liu, Ben-<br>jamin D<br>et. al./<br>USA<br>Pt. 1 | 86 yr/F  | Moder-<br>na     | CKD<br>stage 3,<br>Type 2<br>DM | 7 days/ first<br>dose  | Acute confu-<br>sion with vis-<br>ual hallucina-<br>tions and left<br>frontal head-<br>ache                  | CT head and MRI<br>brain: no acute<br>findings<br>EEG: non-convul-<br>sive focal status sei-<br>zure                                                                                                                                                                                                                 | Encephalo-<br>pathy                                                                                                                                           | Loraze-<br>pam and<br>Fospheny-<br>toin; Le-<br>vetirace-<br>tam on<br>discharge                | Im-<br>proved               |  |

|                                    |          |              |                                                              |                     |                                                                                                                                                                       |                                                                                                                                                                                                                                                                                     |                                               |                                                          |          |
|------------------------------------|----------|--------------|--------------------------------------------------------------|---------------------|-----------------------------------------------------------------------------------------------------------------------------------------------------------------------|-------------------------------------------------------------------------------------------------------------------------------------------------------------------------------------------------------------------------------------------------------------------------------------|-----------------------------------------------|----------------------------------------------------------|----------|
| Liu, Benjamin D et. al./ USA Pt. 2 | 73 yr/M  | Moder na     | Crohn's, hereditary hemochromatosis, HTN, and hyperlipidemia | 7 days/ first dose  | Unresponsive-ness (staring episodes), restlessness, cognitive deficits, hallucinations, and confusion                                                                 | CT head and MRI brain: no acute findings<br>EEG: non-convulsive focal status seizure                                                                                                                                                                                                | Encephalopathy                                | Lorazepam and Levetiracetam                              | Improved |
| Chuang T.Y. et. al./ USA           | 45 yr/M  | Moder na     | None                                                         | 5 days/ NA          | Severe left-sided headache, unilateral eye pain with progressive ptosis, decreased vision, binocular diplopia, afferent pupillary defect and complete ophthalmoplegia | CT Head: Hyperattenuation of left cavernous sinus<br>MRI brain and orbits and MRA/MRV head: Bilateral perineural enhancement surrounding optic nerve sheaths (left greater than right), plus single ill-defined enhancement in left orbital apex extending into the cavernous sinus | Tolosa-Hunt syndrome (THS)                    | Broad-spectrum antibiotics (discontinued), oral steroids | Improved |
| Torrealba-Acosta G. et. al./ USA   | 77 yr/ M | Moder na     | CAD, hyperlipidemia, hypothyroidism                          | 1 day/ first dose   | Fever, generalized body rash, headache, dizziness, double vision, irregular orofacial movements, bilateral upper extremity myoclonus.                                 | MRI Brain and Cervical spine: Normal<br>CSF analysis: Cells: 120/mm3, protein: 124 mg/dl.                                                                                                                                                                                           | Acute encephalitis, myoclonus, sweet syndrome | Acyclovir, Methylprednisolone, antibiotics               | Improved |
| Aladdin Y. et. al./ Saudi Arabia   | 42 yr/ F | Astra-Zeneca | NA                                                           | 10 days/ first dose | Headache and subjective fever, generalized tonic-clonic seizure                                                                                                       | MRI Brain: Subtle increase in the signal on FLAIR images at bilateral hippocampus and insula that was correlating with postictal changes                                                                                                                                            | Refractory Status Epilepticus                 | Levetiracetam, Phenytoin, Lacosamide                     | Improved |
| Ghosh R. et. al./ India            | 68 yr/ M | Astra-Zeneca | HTN                                                          | 4 days/ first dose  | Impaired consciousness, bowel incontinence,                                                                                                                           | MRI Brain: Mild periventricular leukoariosis (left > right) and generalized cortical                                                                                                                                                                                                | Focal onset non-motor seizure                 | Brivaracetam                                             | Improved |

behavioral dis- atrophy (predomi-  
turbances nantly affecting  
posterior cortex,  
right > left)

M- male; F- female; NA- not available; TM- transverse myelitis; NMOSD- neuromyelitis optica spectrum disorder; LETM- longitudinally extensive transverse myelitis; ADEM- acute disseminated encephalomyelitis; RRMS- relapsing remitting multiple sclerosis; CVST- cerebral venous sinus thrombosis; SAH- subarachnoid hemorrhage; ICH- intracranial hemorrhage; DIC- disseminated intravascular coagulation; MI- myocardial infarction; THS- Tolosa-Hunt syndrome; DM- diabetes mellitus; CAD- coronary artery disease; CKD- chronic kidney disease; HTN- hypertension; MRC- medical research council; MRA- magnetic resonance arteriogram; MRV- magnetic resonance venogram; MRI- magnetic resonance imaging; FLAIR- fluid-attenuated inversion recovery; CT- computed tomography; EEG- electroencephalogram; CSF- cerebrospinal fluid; IVIG- intravenous immunoglobulin; PLEX- Plasmapheresis; HRT- hormone replacement therapy

**Table S2.** Studies with data from case reports and case series on COVID-19 vaccine and PNS associated manifestations.

| Author/<br>country            | Patient<br>age<br>/gender | Type of<br>COVID-19<br>vaccine | Comor-<br>bidities                     | Time<br>Duration/<br>Doses<br>to<br>neurological<br>symptom<br>onset | Neurological<br>presentation           | Diagnostic Mo-<br>dality (RNS, sin-<br>gle fiber EMG,<br>NCS, MRI, mus-<br>cle biopsy)                                                                                                                                                                                                                                                       | Diagnosis | Manage-<br>ment | Out-<br>come                                   |
|-------------------------------|---------------------------|--------------------------------|----------------------------------------|----------------------------------------------------------------------|----------------------------------------|----------------------------------------------------------------------------------------------------------------------------------------------------------------------------------------------------------------------------------------------------------------------------------------------------------------------------------------------|-----------|-----------------|------------------------------------------------|
| Waheed<br>S. et. al./<br>USA  | 82/F                      | Pfizer                         | None                                   | 14 days/ sec-<br>ond dose                                            | Sustained fall<br>due to weak-<br>ness | Sagittal T1 post-<br>contrast MRI<br>lumbar spine<br>demonstrating<br>enhancement of<br>cauda equina<br>nerve roots                                                                                                                                                                                                                          | GBS       | IVIG            | Non-fa-<br>tal/im-<br>proved                   |
| Razok A.<br>et. al./<br>Qatar | 73/M                      | Pfizer                         | HTN,<br>Rheuma-<br>toid ar-<br>thritis | 20 days/ sec-<br>ond dose                                            | Bilateral lower<br>limb weakness       | MRI of the spine<br>showed bilateral<br>nerve root en-<br>hancement in the<br>lumbar region<br>and the upper<br>part of the cauda<br>equina<br>CSF protein at 80<br>mg/dl and ele-<br>vated albumin at<br>421 mg/L.<br>Nerve conduc-<br>tion study (NCS)<br>and electromyo-<br>gram (EMG)<br>showed bilateral<br>absent H reflexes<br>in the | GBS       | IVIG            | Non-fa-<br>tal/par-<br>tially<br>im-<br>proved |

|                               |      |              |                                 |                     |                                                                                                                                                                           |                                                                                                                                                                                                     |                                        |            |                              |
|-------------------------------|------|--------------|---------------------------------|---------------------|---------------------------------------------------------------------------------------------------------------------------------------------------------------------------|-----------------------------------------------------------------------------------------------------------------------------------------------------------------------------------------------------|----------------------------------------|------------|------------------------------|
|                               |      |              |                                 |                     |                                                                                                                                                                           | gastrocnemius muscles consistent with early polyneuroradiculopathy                                                                                                                                  |                                        |            |                              |
| James J. et. al./ India Pt. 1 | 60/M | Astra-Zeneca | COPD                            | 11 days/ first dose | Proximal weakness of the upper and lower limbs. Subsequently, numbness progressed and ascended up to the ankles in the lower limbs and up to the wrist in the upper limbs | Nerve conduction study (NCS) showed sensorimotor axonal neuropathy. Cerebrospinal fluid (CSF) analysis showed elevated protein, normal sugar, and no cells                                          | GBS                                    | IVIG       | Non-fatal/partially improved |
| James J. et. al./ India Pt. 2 | 66/M | Astra-Zeneca | NO                              | 12 days/ first dose | Sensorimotor weakness Proximal lower limb with mild hand grip weakness                                                                                                    | Nerve conduction study (NCS) showed demyelination with secondary axonopathy                                                                                                                         | GBS                                    | IVIG, IVMP | Non-fatal/partially improved |
| James J. et. al./ India Pt. 3 | 54/F | Astra-Zeneca | Mastectomy for breast carcinoma | 13 days/first dose  | Sensorimotor weakness Proximal upper and lower limbs with weak hand grips. Trunk and neck weakness. Early respiratory involvement                                         | Nerve conduction study (NCS) showed demyelination with secondary axonopathy                                                                                                                         | GBS                                    | IVIG/IVMP  | Non-fatal/partially Improved |
| Prasad A. et. al./ USA        | 41/M | Janssen      | Morbid obesity                  | 15 days             | Facial diplegia                                                                                                                                                           | EMG showed a prolonged distal latency with conduction block and slow conduction velocity in bilateral tibial, peroneal nerve, and absent F waves. Csf showed albumino-cytological dissociation with | GBS (facial diplegia with paresthesia) | IVIG       | Non-fatal/improved           |

|                                |      |              |      |                   |                                                                                                                                                   |                                                                                                                                                                                                                                                                                                                                |                                                                                                                                                       |      |                              |  |
|--------------------------------|------|--------------|------|-------------------|---------------------------------------------------------------------------------------------------------------------------------------------------|--------------------------------------------------------------------------------------------------------------------------------------------------------------------------------------------------------------------------------------------------------------------------------------------------------------------------------|-------------------------------------------------------------------------------------------------------------------------------------------------------|------|------------------------------|--|
|                                |      |              |      |                   |                                                                                                                                                   |                                                                                                                                                                                                                                                                                                                                | a CSF cell count of 50/uL (lymphocytes 91%, monocyte 9%, and CSF protein of 562 mg/dL. MRI lumbar spine showed thickening of cauda equina nerve roots |      |                              |  |
| Márquez Loza A.M. et. al./ USA | 60/F | Janssen      | None | 10 days           | Back and leg pain, diplopia, headache, bilateral facial weakness, numbness, areflexia                                                             | Brain MRI was normal. Lumbar puncture revealed the CSF had elevated protein (140 mg/dL), 9 nucleated cells, and glucose 63 mg/dL. Electrophysiologic studies showed normal compound muscle and sensory nerve action potentials and absent late responses (peroneal and posterior tibialis F-waves and H-reflexes) in the legs. | GBS                                                                                                                                                   | IVIG | Non-fatal/improved           |  |
| Introna A. et. al./ Italy      | 62/M | Astra-Zeneca | HTN  | 2 days/first dose | Visual discomfort, ascending tetraparesis with proximal weakness, bilateral facial weakness, dysphagia, urinary retention, and distal paresthesia | Fundoscopy revealed severe bilateral optic disc edema CSF albumin-cytologic dissociation (total protein count 101 mg/dl, 5 white blood cells). Electrophysiologic study showed severe sensorimotor                                                                                                                             | GBS                                                                                                                                                   | IVIG | Non-fatal/partially improved |  |

|                                 |      |                  |            |                           |                                                                                                                                |                                                                                                                                                                                                                                                                                                                                                                                                                                                   |                                                                                                                                                                 |                                                  |                                 |  |
|---------------------------------|------|------------------|------------|---------------------------|--------------------------------------------------------------------------------------------------------------------------------|---------------------------------------------------------------------------------------------------------------------------------------------------------------------------------------------------------------------------------------------------------------------------------------------------------------------------------------------------------------------------------------------------------------------------------------------------|-----------------------------------------------------------------------------------------------------------------------------------------------------------------|--------------------------------------------------|---------------------------------|--|
|                                 |      |                  |            |                           |                                                                                                                                |                                                                                                                                                                                                                                                                                                                                                                                                                                                   | mixed polyneu-<br>ropathy (demye-<br>lination with pre-<br>dominant axonal<br>changes)<br>Antiganglioside<br>antibodies posi-<br>tive for IgG GM1<br>(titer 39) |                                                  |                                 |  |
| Suri V. et.<br>al./<br>India    | 47/M | Astra-<br>Zeneca | DM,<br>HTN | 17 days/first<br>dose     | Pure motor-<br>flaccid quad-<br>riplegia with<br>bilateral facial<br>weakness with<br>inability to<br>stand without<br>support | Brain MRI non-<br>specific hyperin-<br>tensities in white<br>matter in T2-<br>FLAIR image.<br>Spine MRI with<br>contrast showed<br>enhancing thick-<br>ening of cauda<br>equina nerve<br>roots. NCV<br>study, suggestive<br>of acute inflam-<br>matory demye-<br>linating poly-<br>radiculoneuropa-<br>thy CSF revealed<br>albuminocyto-<br>logical dissocia-<br>tion with protein<br>of 250 mg/dL<br>and glucose of<br>106 mg/dL and 0<br>cells. | Relapsing<br>CIDP                                                                                                                                               | IVIG, pred-<br>nisolone<br>and azathi-<br>oprine | Non-<br>fatal/<br>im-<br>proved |  |
| Scedoni<br>R. et. al./<br>Italy | 82/F | Pfizer           | AF/HTN     | 14 days/ sec-<br>ond dose | progressive<br>worsening of<br>walking, with a<br>lack of strength<br>and sensitivity<br>in the lower<br>limbs.                | Electroneurogra-<br>phy results<br>showed acute<br>sensory-motor<br>neuropathy of<br>the demyelinat-<br>ing type. Electro-<br>myography<br>showed de-<br>creased recruit-<br>ment to the anal-<br>ysis of voluntary<br>muscle activity,<br>with signs of<br>spontaneous                                                                                                                                                                           | GBS<br>(AMSAN)                                                                                                                                                  | IVIG                                             | Non-<br>fatal/<br>im-<br>proved |  |

|                              |      |              |      |                     |                                                                                                                              |                                                                                                                                                                                                                                                                                                                                                                                                                                                                                                                                                                                                                                  |                                        |              |                     |  |                                                                                                                                                            |
|------------------------------|------|--------------|------|---------------------|------------------------------------------------------------------------------------------------------------------------------|----------------------------------------------------------------------------------------------------------------------------------------------------------------------------------------------------------------------------------------------------------------------------------------------------------------------------------------------------------------------------------------------------------------------------------------------------------------------------------------------------------------------------------------------------------------------------------------------------------------------------------|----------------------------------------|--------------|---------------------|--|------------------------------------------------------------------------------------------------------------------------------------------------------------|
|                              |      |              |      |                     |                                                                                                                              |                                                                                                                                                                                                                                                                                                                                                                                                                                                                                                                                                                                                                                  |                                        |              |                     |  | activity. Anti-ganglioside antibodies, in particular anti-sulfatide IgG (+) and IgM (++), anti-GM2 IgM (+) and anti-GM4 IgM (+) antibodies, were positive. |
| Allen C.M. et. al./ UK Pt. 1 | 54/M | Astra-Zeneca | None | 16 days/ first dose | Distal dysesthesia in his feet and hands, which ascended over two days, but had begun to recede as facial weakness developed | Electrophysiological assessment facial (NCS) showed severely reduced compound muscle action potential amplitude responses and normal terminal latencies bilaterally. The right orbicularis oris and oculi showed active denervation with no volitional motor activity. The left orbicularis oris and oculi showed active denervation with occasional fast firing, long duration polyphasic units and severely reduced recruitment. Sensory and motor NCS were normal in the upper and lower limbs CSF analysis revealed a mild lymphocytosis (19 cells / micro-litre (ml), normal range ≤5) and elevated protein (162.6 mg/dl)). | GBS (facial diplegia with paresthesia) | Prednisolone | Non-fatal/ improved |  |                                                                                                                                                            |

|                                       |      |                  |                              |                        |                                                                                                                                                                                                                                                                                                                                                                                                                                                                                                                                                                                                                                                                                                          |  |  |                   |                                 |
|---------------------------------------|------|------------------|------------------------------|------------------------|----------------------------------------------------------------------------------------------------------------------------------------------------------------------------------------------------------------------------------------------------------------------------------------------------------------------------------------------------------------------------------------------------------------------------------------------------------------------------------------------------------------------------------------------------------------------------------------------------------------------------------------------------------------------------------------------------------|--|--|-------------------|---------------------------------|
|                                       |      |                  |                              |                        | Normal MRI<br>brain with con-<br>trast                                                                                                                                                                                                                                                                                                                                                                                                                                                                                                                                                                                                                                                                   |  |  |                   |                                 |
|                                       |      |                  |                              |                        | MRI of the brain<br>was normal. CSF<br>analysis revealed<br>a mild lympho-<br>cytosis (14 cells /<br>ml) and elevated<br>protein (123.2 mg<br>/dl). Facial NCS<br>showed border-<br>line normal am-<br>plitude re-<br>sponses and nor-<br>mal terminal la-<br>tencies bilater-<br>ally. Bilaterally,<br>orbicularis oculi<br>and oris showed GBS (facial<br>active denerva-<br>tion in addition<br>to early recruited<br>fast firing poly-<br>phasic units of<br>small duration<br>and low ampli-<br>tude. Sensory<br>and motor NCS<br>were normal in<br>the upper and<br>lower limbs.<br>Minimum F<br>wave latencies<br>were 28 ms in the<br>right ulnar nerve<br>and 49-50 ms in<br>the tibial nerves. |  |  |                   |                                 |
| Allen<br>C.M. et.<br>al. /UK<br>Pt. 2 | 20/M | Astra-<br>Zeneca | Ulcer-<br>ative coli-<br>tis | 26 days/ first<br>dose | Developed<br>dysesthesia in<br>his distal lower<br>limbs and three<br>days before ad-<br>mission he de-<br>veloped facial<br>diplegia                                                                                                                                                                                                                                                                                                                                                                                                                                                                                                                                                                    |  |  | Predniso-<br>lone | Non-<br>fatal/<br>im-<br>proved |
|                                       |      |                  |                              |                        | Dull lumbar    Sensory and mo-<br>back pain radi-    tor NCS were<br>ating to flanks,    normal in the up-<br>followed by    per and lower<br>dysarthria, fa-    limbs.<br>cial and proxi-    Non-contrast<br>mal leg weak-    MRI of the brain<br>ness, and distal    was normal. CSF<br>dysaesthesia in    analysis revealed<br>feet    a mild                                                                                                                                                                                                                                                                                                                                                         |  |  |                   |                                 |
| Allen<br>C.M. et.<br>al. /UK<br>Pt. 3 | 57/M | Astra-<br>Zeneca | OA and<br>Asthma             | 21 days/<br>first dose |                                                                                                                                                                                                                                                                                                                                                                                                                                                                                                                                                                                                                                                                                                          |  |  | IVIG              | Non-<br>fatal/<br>im-<br>proved |

|                                |      |              |                       |                                         |                                                                                                                                                             |                                                                                                                                                                                                                                            |                                        |                             |                     |
|--------------------------------|------|--------------|-----------------------|-----------------------------------------|-------------------------------------------------------------------------------------------------------------------------------------------------------------|--------------------------------------------------------------------------------------------------------------------------------------------------------------------------------------------------------------------------------------------|----------------------------------------|-----------------------------|---------------------|
|                                |      |              |                       |                                         |                                                                                                                                                             | lymphocytosis (8 cells / ml) and elevated protein (247.1 mg /dl).                                                                                                                                                                          |                                        |                             |                     |
| Allen C.M. et. al. /UK / Pt. 4 | 55/M | Astra-Zeneca | HTN                   | 29 days/ first dose                     | Bilateral thigh paresthesias. One day later he reported numbness to the sacral and lumbar regions. Two days prior to admission he developed facial diplegia | MRI brain and whole spine with contrast showed enhancement of the facial nerve within the right internal auditory canal. CSF analysis revealed normal cell count (4 lymphocytes / ml) and elevated protein (89 mg / dl). NCS not performed | GBS (facial diplegia with paresthesia) | NA                          | Non-fatal/ improved |
| Burrows A. et. al./ UK         | 61/M | Pfizer       | DM/ HTN/ dyslipidemia | 1 day/first dose<br>2 days/ second dose | Right-sided lower motor neuron facial palsy with incomplete eye closure and no forehead movement                                                            | NA                                                                                                                                                                                                                                         | Bell's palsy (sequential)              | High dose steroid           | Non-fatal/ improved |
| Repajic M. et. al./ USA        | 57/F | Pfizer       | Bell's Palsy and HTN  | 2 days/second dose                      | Left-sided facial droop, left hyperacusis, ageusia, lagophthalmos, and facial soreness                                                                      | NA                                                                                                                                                                                                                                         | Bell's Palsy                           | Prednisone, antiviral agent | Non-fatal/improved  |
| Colella G. et. al./ USA        | 37/M | Pfizer       | None                  | 5 days/ first dose                      | Left-sided facial droop, hemiparesis                                                                                                                        | Not done                                                                                                                                                                                                                                   | Bell's Palsy                           | Prednisone, eye drops       | Partial improvement |
| Yu B. et. al./ China           | 36/F | Sinovac      | Bell's palsy          | 2 days/first dose                       | Right- sided facial weakness                                                                                                                                | CT head: normal                                                                                                                                                                                                                            | Bell's palsy                           | Prednisolone                | Non-fatal/ improved |
| Ish S. et. al./ India          | 50/M | COVAXIN      | None                  | 21 days/ second dose                    | Right-sided facial palsy (LMN type)                                                                                                                         | NA                                                                                                                                                                                                                                         | Bell's Palsy                           | Prednisolone                | Non-fatal/ improved |

|                             |      |        |      |                        |                                                                                                                              |                                                                                                                                                                                                                                                  |                           |                     |                              |
|-----------------------------|------|--------|------|------------------------|------------------------------------------------------------------------------------------------------------------------------|--------------------------------------------------------------------------------------------------------------------------------------------------------------------------------------------------------------------------------------------------|---------------------------|---------------------|------------------------------|
| Waqar<br>W. et. al./<br>USA | 57/F | Pfizer | None | 7 days/<br>second dose | Intense burning<br>dysesthesias in<br>the feet, gradu-<br>ally spreading<br>to the calves<br>and minimally<br>into the hands | An electrodiag-<br>nostic study per-<br>formed on the<br>day of presenta-<br>tion was normal.<br>Skin biopsies<br>showed multifo-<br>cal involvement<br>Hematoxylin and<br>eosin and CD3<br>staining showed<br>no histologic ab-<br>normalities. | Small fiber<br>neuropathy | Anti-epi-<br>leptic | Non-fa-<br>tal/im-<br>proved |
| Keir G.<br>et. al./<br>USA  | 57/F | Pfizer | None | NA/second<br>dose      | Altered sense of<br>smell -“Smell-<br>ing smoke”-<br>and headaches                                                           | axial T2 and<br>FLAIR images<br>there was T2 sig-<br>nal hyperinten-<br>sity along the left<br>olfactory bulb<br>and bilateral ol-<br>factory tracts<br>suggestive of<br>edema                                                                   | Phantos-<br>mia           | NA                  | NA                           |

M – Male; F – Female; GBS, Guillain-Barré syndrome; AMSAN - Acute motor and sensory axonal neuropathy; AMAN - Acute motor axonal neuropathy; BFP- Bifacial Diplegia; MFS - Miller-Fisher syndrome; NCS, Nerve conduction study; EMG, Electromyography; CSF, Cerebrospinal fluid; HTN, Hypertension; DM, Diabetes mellitus.

**Table S3.** Studies with grouped data with associated neurological manifestations with severity and outcomes for post COVID-19 vaccination.

| Author/Country<br>All Studies from | No. of Patients with<br>Neuroimaging Findings | Vaccine type                                                                                | Neurological<br>Manifestation<br>CNS = 1,<br>PNS = 2                                    | MRI Findings                                                                                                       | Outcome<br>(Non-Fatal = 1,<br>Fatal = 2) |
|------------------------------------|-----------------------------------------------|---------------------------------------------------------------------------------------------|-----------------------------------------------------------------------------------------|--------------------------------------------------------------------------------------------------------------------|------------------------------------------|
| Hartmut Goebel et.al/ Germany      | 2464                                          | ChAdOx1 nCoV-19 (AZD1222) =2464                                                             | 1= 2464 (Headache)<br>2=0                                                               | N/A                                                                                                                | 1=2464<br>2=0                            |
| Formeister EJ et.al/USA            | 40                                            | Pfizer =28<br>Moderna =12                                                                   | 1=40 (Sensori-neural hearing loss)<br>2=0                                               | N/A                                                                                                                | 1=40<br>2=0                              |
| Pedro M Folegatti, et.al /UK       | 1077                                          | ChAdOx1 nCoV-19 (AZD1222) =543<br>MenACWY=534                                               | 1=1077 (Headache)<br>2=0                                                                | N/A                                                                                                                | 1=1077<br>2=0                            |
| Krzywicka K et.al/ Netherland      | 213                                           | ChAdOx1 nCoV-19 (AZD1222) =187<br>Pfizer =25<br>Moderna =1                                  | 1=213 (Cerebral venous sinus thrombosis)<br>2=0                                         | N/A                                                                                                                | 1=167<br>2=46                            |
| Perry et.al /UK                    | 95                                            | ChAdOx1 nCoV-19 (AZD1222) =91<br>Pfizer =4                                                  | 1=95 (Cerebral venous sinus thrombosis)<br>2=0                                          | multiple venous infarction (10).<br>multiple intracerebral hemorrhages (26)<br>extracranial venous thrombosis (32) | 1=41<br>2=54                             |
| Renoud Lucie et.al/France          | 844                                           | Pfizer =749<br>Moderna =95                                                                  | 1=0<br>2=844 (Facial palsy)                                                             | N/A                                                                                                                | 1=844<br>2=0                             |
| Van Kammen et.al/ Amsterdam        | 116                                           | ChAdOx1 nCoV-19 (AZD1222) =96<br>Pfizer=16<br>Sinovac=2<br>Moderna=1<br>Johnson & Johnson=1 | 1=116 (Cerebral venous sinus thrombosis)<br>2=0                                         | intracerebral hemorrhage (58)<br>thromboembolism (32)                                                              | 1=58<br>2=58                             |
| Martina Patone, Lahiru et.al/UK    | 12,650                                        | ChAdOx1 nCoV-19 (AZD1222) =1860<br>Pfizer= 1080<br>NA=9710                                  | 1=8779 (CNS demyelination, encephalitis, meningitis, myelitis, hemorrhagic stroke, SAH) | N/A                                                                                                                | 1=11,489<br>2=1161                       |

---

2=3871 (GBS,  
Bell's Palsy,  
Myasthenic  
disorder)

---

CNS, Central nervous system; GBS, Guillain-Barré syndrome.
